# Supplementary material
Source: PubMed Central journal article supplement (PMC4240208)
Supplement: supp_ddu384_ddu384supp_table1.pdf [file supp_ddu384_ddu384supp_table1.pdf]

**Autozygous regions exclusive to index**

chr3:114175900-133917300

chr3:180475300-188221600

chr9:74983440-76109970

chr9:91712460-96654540

chr11:3838489-6016511

chr14:104662300-107260700

chr17:53755000-78040440

chr17:39081710-40150580

chr20:20971320-22061630
