# Supplementary material
Source: PubMed Central journal article supplement (PMC4240208)
Supplement: supp_ddu384_ddu384supp_table2.pdf [file supp_ddu384_ddu384supp_table2.pdf]

|                                                                     |               |
|---------------------------------------------------------------------|---------------|
| <b>Total reads</b>                                                  | 48,370,376    |
| <b>Total yield (bp)</b>                                             | 4,885,407,976 |
| <b>Read length (bp)</b>                                             | 101           |
| <b>Target regions (bp)</b>                                          | 51,189,318    |
| <b>Average throughput depth of target regions</b>                   | 95.4          |
| <b>Initial mappable reads (mapped to human genome)</b>              | 48,226,494    |
| <b>% Initial mappable reads (out of total reads)</b>                | 99.70%        |
| <b>Non-redundant reads (de-duplicated by Picard tools)</b>          | 40,185,068    |
| <b>% Non-redundant reads (out of initial mappable reads)</b>        | 83.30%        |
| <b>Non-redundant unique reads (uniquely mapped to human genome)</b> | 39,499,130    |
| <b>% Non-redundant unique reads (out of non-redundant reads)</b>    | 98.30%        |
| <b>On-target reads (mapped to target regions)</b>                   | 33,227,086    |
| <b>% On-target reads (out of non-redundant unique reads)</b>        | 84.10%        |
| <b>% Coverage of target regions (more than 1X)</b>                  | 98.80%        |
| <b>Number of on-target genotypes (more than 1X)</b>                 | 50,588,994    |
| <b>% Coverage of target regions (more than 10X)</b>                 | 95.60%        |
| <b>Number of on-target genotypes (more than 10X)</b>                | 48,939,557    |
| <b>Mean read depth of target regions</b>                            | 56.8          |
| <b>Number of SNPs</b>                                               | 65,425        |
| <b>Number of coding SNPs</b>                                        | 20,088        |
| <b>Number of synonymous SNPs</b>                                    | 10,575        |
| <b>Number of nonsynonymous SNPs</b>                                 | 8,999         |
| <b>Number of Indels</b>                                             | 5,739         |
| <b>Number of coding Indels</b>                                      | 450           |
